# Supplementary material
Source: Springer Nature journal article supplement (https://www.springermedizin.de/resource/supplementary/12874_2007_230_MOESM7_ESM.pdf/9434040)

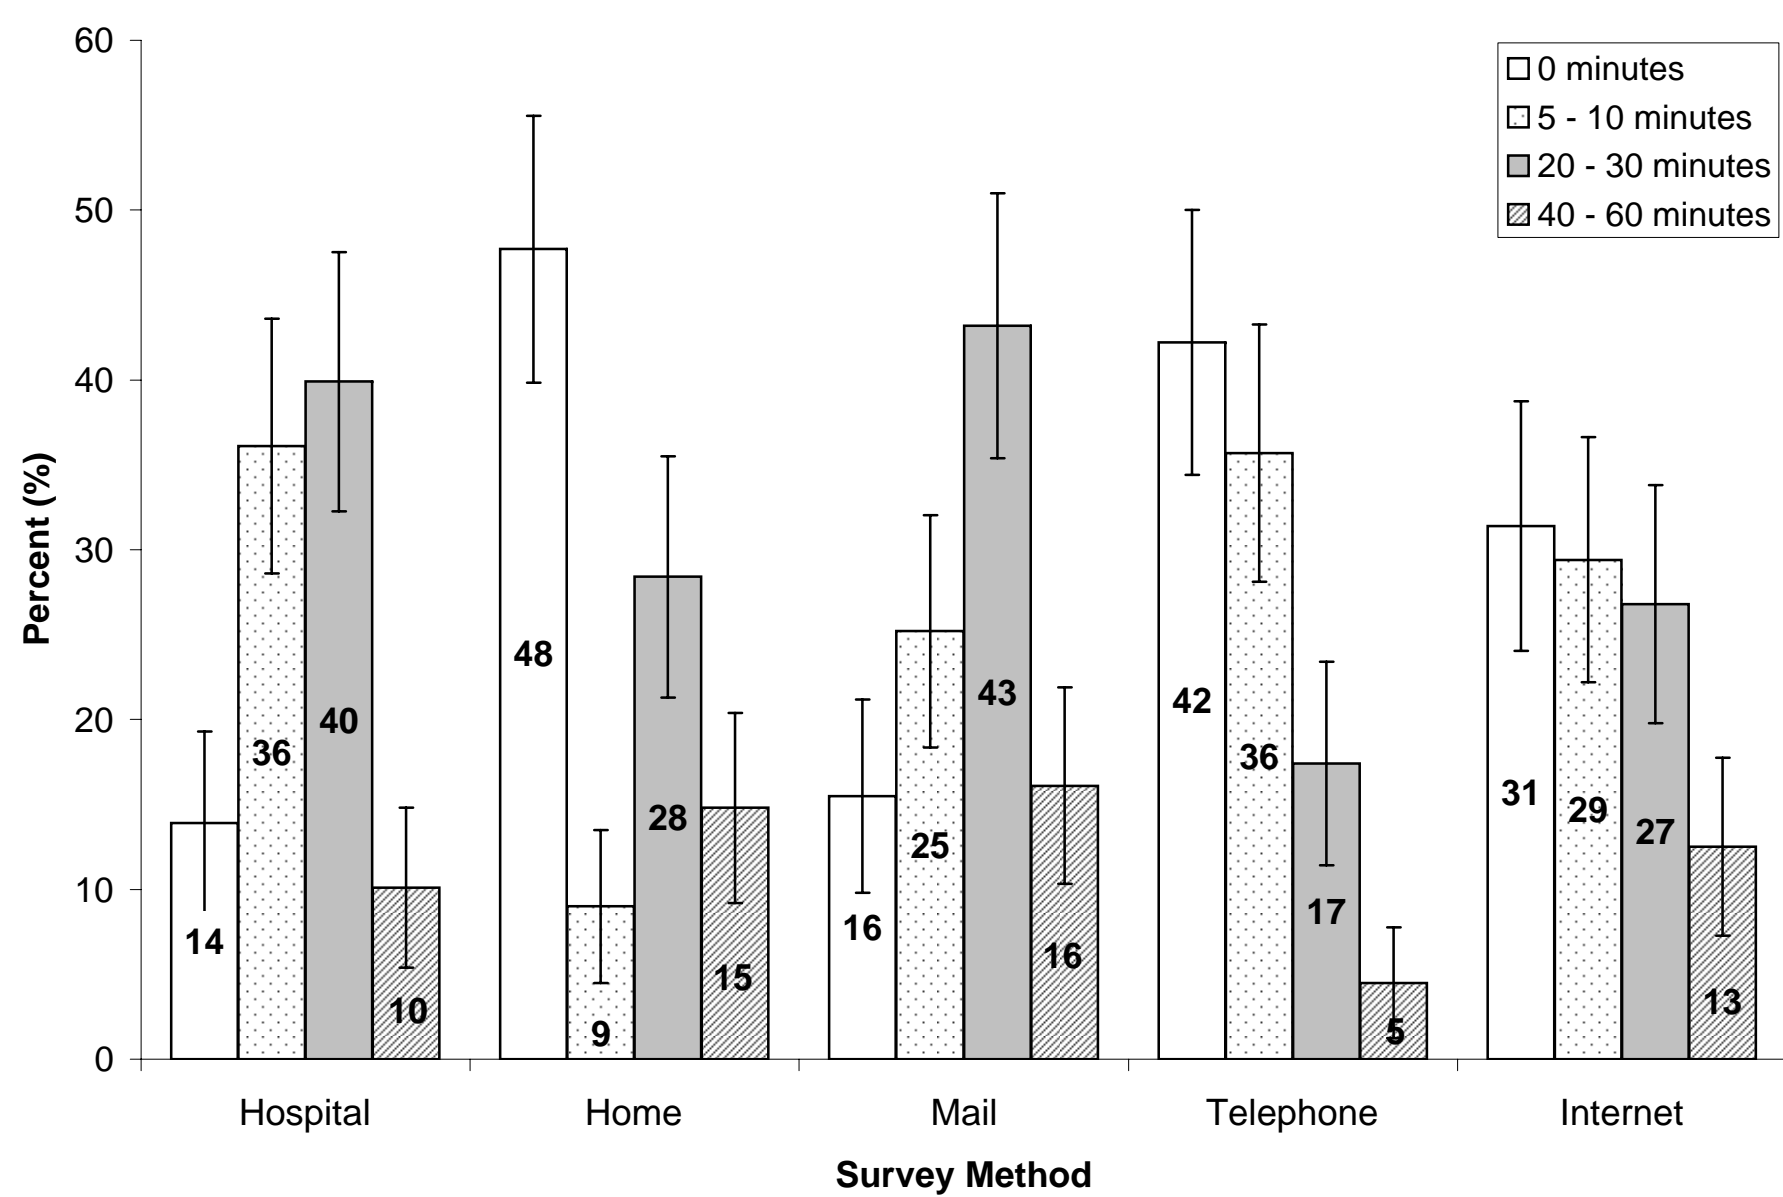

Supplement: MOESM7 [file 9434040]
